# Supplementary material for: Multiple structures of RNA polymerase II isolated from human nuclei by ChIP-CryoEM analysis
Source: Springer Nature journal article supplement (doi:10.1038/s41467-025-59580-x), 2025-05-28
Supplement: MOESM1 [file 41467_2025_59580_MOESM1_ESM.pdf]

## **Supplementary Information for:**

### **Multiple structures of RNA polymerase II isolated from human nuclei by ChIP-CryoEM analysis**

Tomoya Kujirai<sup>1,2</sup>, Junko Kato<sup>1</sup>, Kyoka Yamamoto<sup>1,3</sup>, Seiya Hirai<sup>1,3</sup>, Takeru Fujii<sup>4</sup>,  
Kazumitsu Maehara<sup>4</sup>, Akihito Harada<sup>4,5</sup>, Lumi Negishi<sup>1</sup>, Mitsuo Ogasawara<sup>1</sup>,  
Yuki Yamaguchi<sup>6</sup>, Yasuyuki Ohkawa<sup>4</sup>, Yoshimasa Takizawa<sup>1</sup>, Hitoshi Kurumizaka<sup>1,2,3\*</sup>

<sup>1</sup>Laboratory of Chromatin Structure and Function, Institute for Quantitative Biosciences, The University of Tokyo, 1-1-1 Yayoi, Bunkyo-ku, Tokyo 113-0032, Japan.

<sup>2</sup>Laboratory for Transcription Structural Biology, RIKEN Center for Biosystems Dynamics Research, 1-7-22 Suehiro-cho, Tsurumi-ku, Yokohama 230-0045, Japan.

<sup>3</sup>Department of Biological Sciences, Graduate School of Science, The University of Tokyo, 1-1-1 Yayoi, Bunkyo-ku, Tokyo 113-0032, Japan.

<sup>4</sup>Division of Transcriptomics, Medical Institute of Bioregulation, Kyushu University, 3-1-1 Maidashi, Higashi, Fukuoka 812-0054, Japan.

<sup>5</sup>Department of Multi-Omics, Graduate School of Medical Sciences, Kyushu University, 3-1-1 Maidashi, Higashi-ku, Fukuoka 812-0054, Japan

<sup>6</sup>School of Life Science and Technology, Institute of Science Tokyo, 4259 Nagatsuta, Yokohama 226-8501, Japan.

\*Corresponding author. Email: [kurumizaka@iqb.u-tokyo.ac.jp](mailto:kurumizaka@iqb.u-tokyo.ac.jp)

#### **Supplementary information includes:**

Supplementary Fig. 1–12

Source Data of Supplementary Fig. 1

Supplementary Data 1. The RNAPII-associated proteins identified by LC-MS/MS analysis (full list)

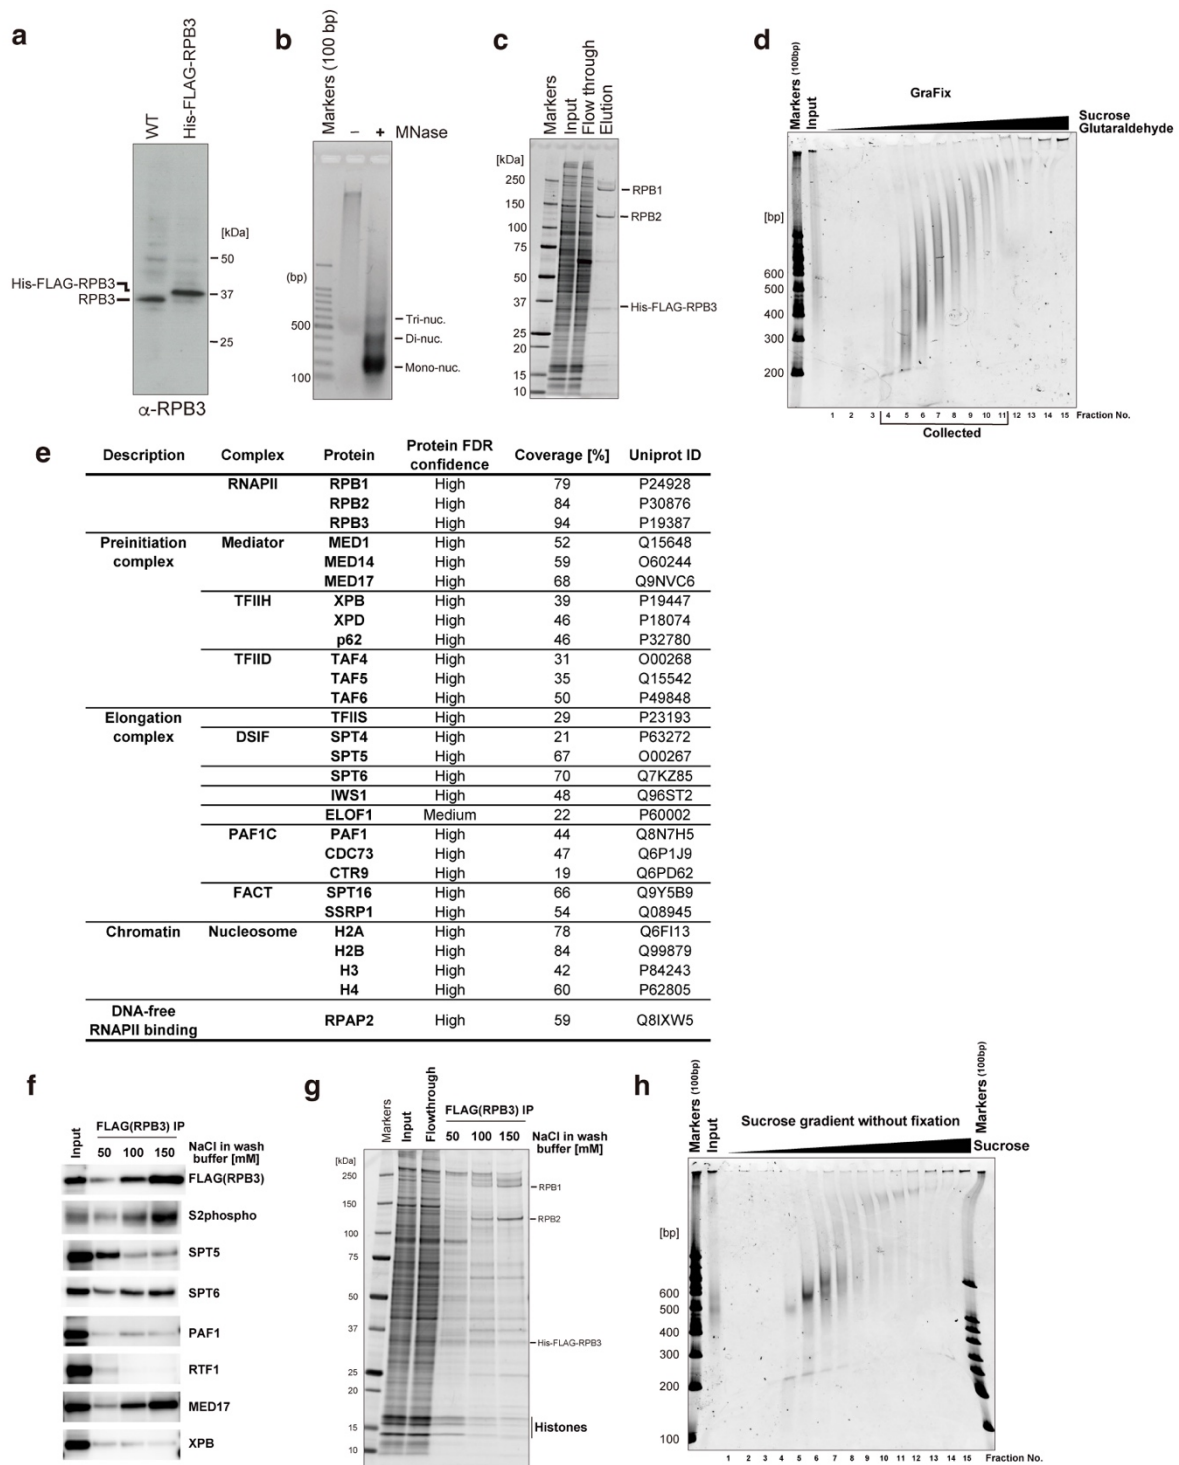

**Supplementary Fig. 1. Preparation of RNAPII complexes from HeLa nuclei by ChIP-cryoEM.** (a) Western blot of the wild-type and His-FLAG-expressing HeLa cells detected by an anti-RPB3 antibody. This experiment was performed once. (b) Chromatin digestion by micrococcal nuclease (MNase). The sonicated chromatin with/without MNase was analyzed by agarose gel electrophoresis with ethidium bromide staining. The bands corresponding to mono-, di-, and tri-nucleosomes are indicated. This experiment was repeated more than three times with similar results. (c) Purification of FLAG-tagged RNAPII by anti-FLAG antibody beads. This experiment was repeated more than three times with similar results. (d) Native polyacrylamide gel electrophoresis (PAGE) of the samples fractionated by GraFix. The nucleic acids (DNA and/or RNA) were visualized by SYBR Gold staining. This experiment

was repeated more than three times with similar results. **(e)** List of selected RNAPII-associated proteins identified by LC-MS/MS analysis. The full list of identified proteins is shown in Supplementary Data 1. This experiment was repeated twice with similar results. **(f)** Western blot of RNAPII-associated proteins. The indicated proteins were detected by antibodies. Different concentrations of NaCl were used to purify the proteins. Uncropped blots in Source Data. This experiment was repeated twice with similar results. **(g)** SDS-PAGE of the eluted proteins. The proteins were visualized by Oriole staining. This experiment was repeated twice with similar results. **(h)** Native-PAGE of the samples fractionated by sucrose gradient without fixation. The nucleic acids (DNA and/or RNA) contained in the fractionated samples were detected by SYBR Gold staining. This experiment was repeated twice with similar results.

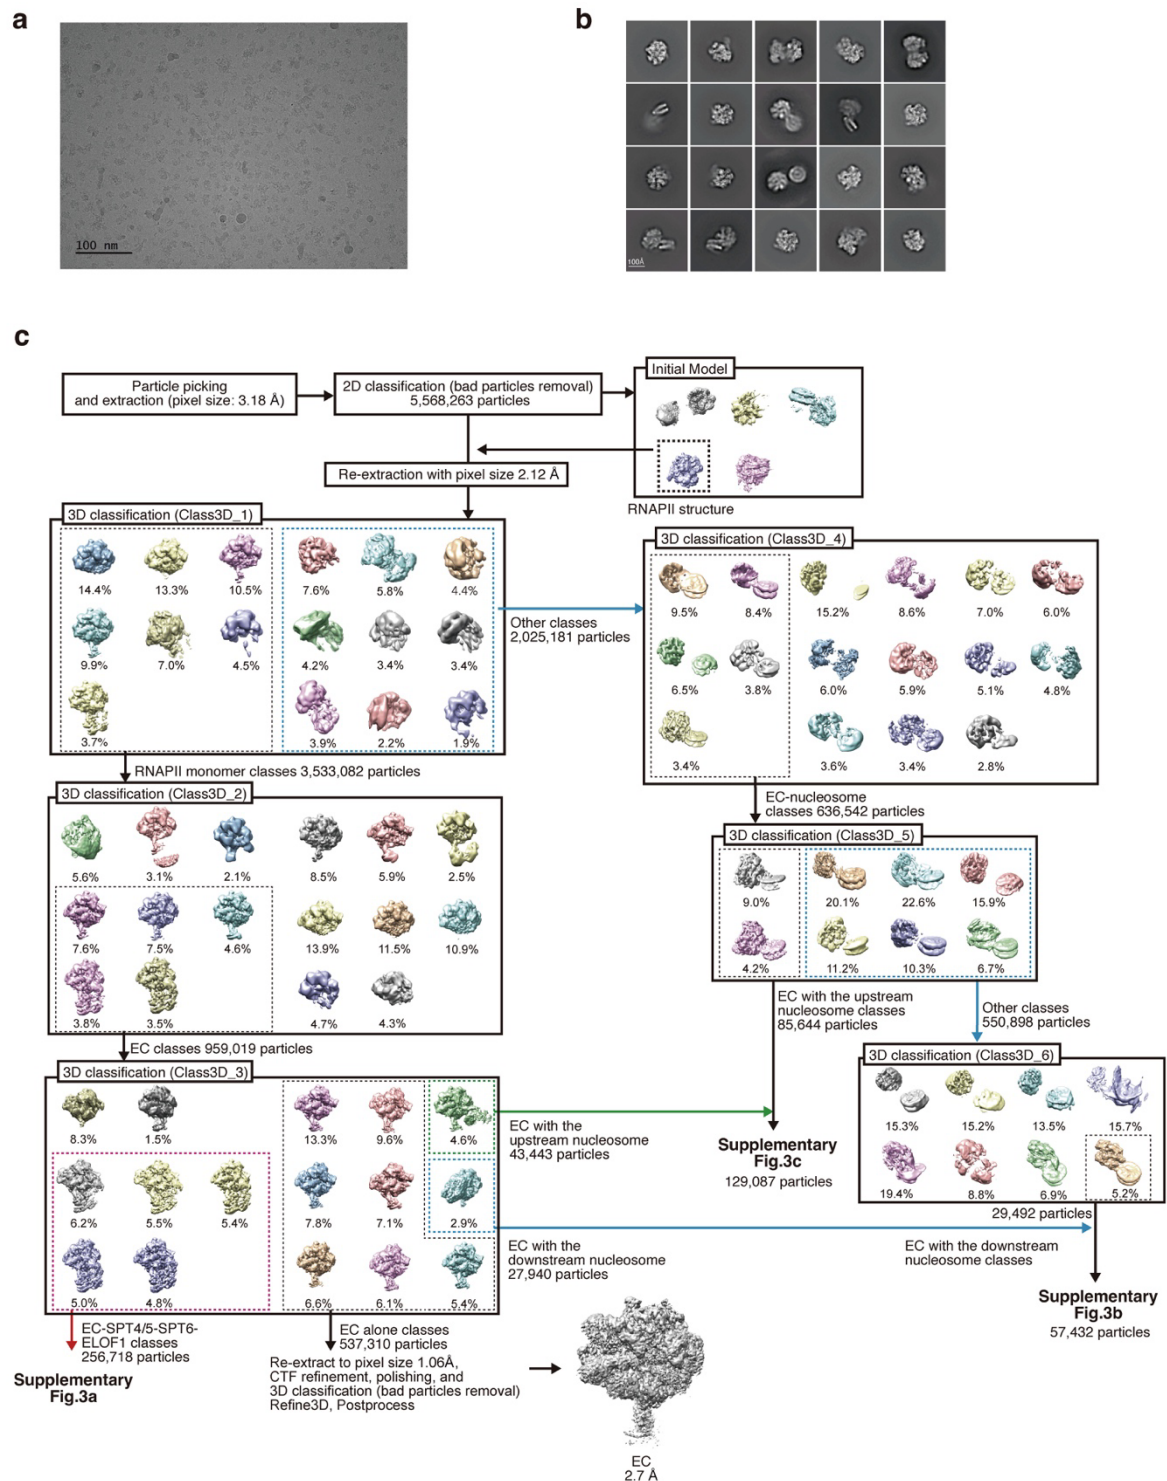

**Supplementary Fig. 2. Cryo-EM data collection and image processing of RNAPII complexes extracted from HeLa nuclei. (a)** Representative micrograph of the RNAPII complexes. The number of micrographs collected is shown in Table 1. **(b)** Representative 2D classes of the RNAPII complexes. The box size is 382 Å x 382 Å. **(c)** Workflow of the image processing.

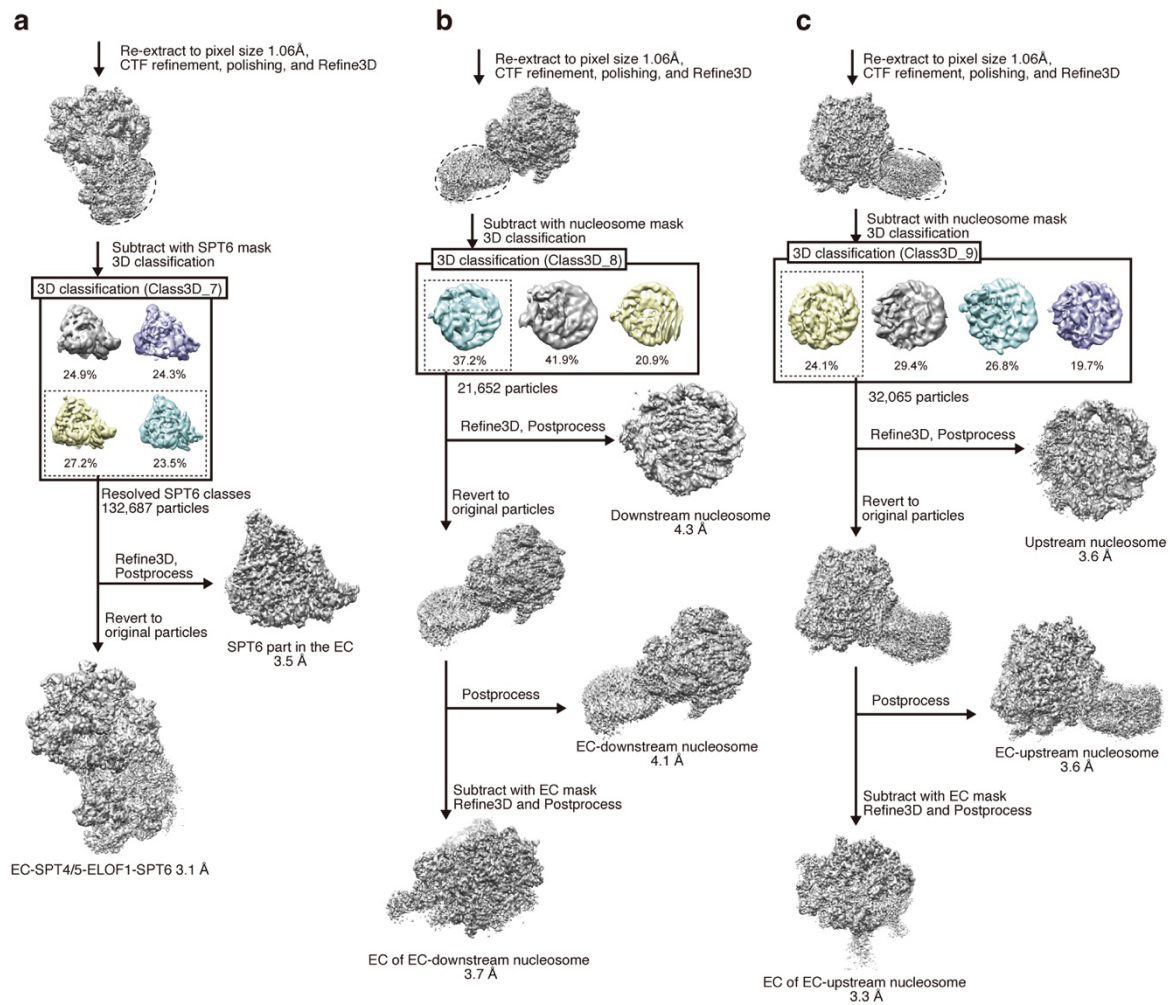

**Supplementary Fig. 3. Image processing of the EC-SPT4/5-ELOF1-SPT6 and EC-nucleosome complexes. (a-c)** Image processing of EC-SPT4/5-ELOF1-SPT6 (a), EC-downstream nucleosome (b), and EC-upstream nucleosome (c).

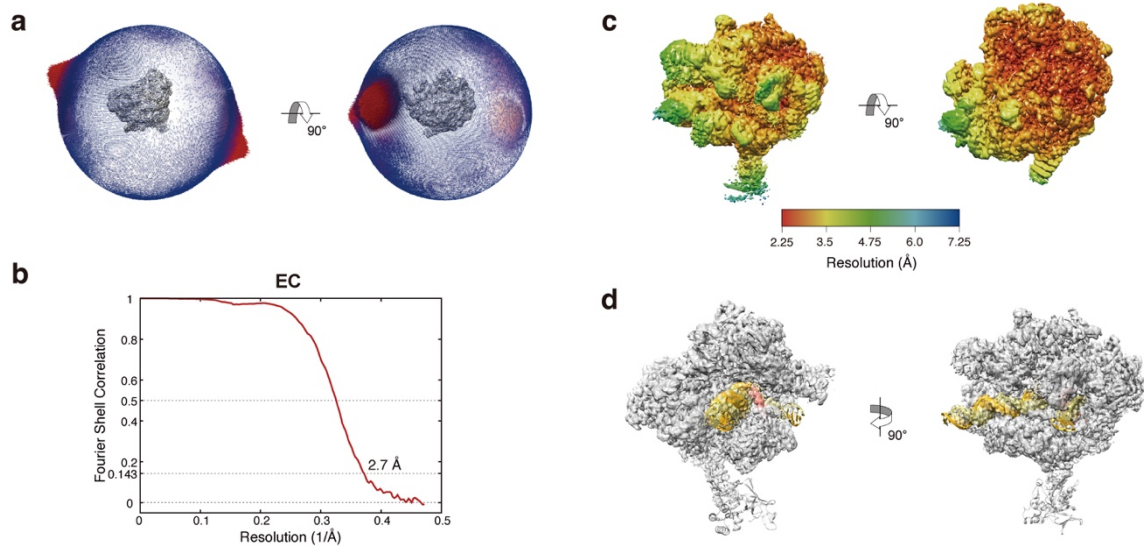

**Supplementary Fig. 4. Quality of the EC structure.** (a) Euler angular distribution of the structures of EC. (b) Fourier Shell Correlation (FSC) curves for EC. The resolution of the EC structure was estimated to be 2.7 Å by an FSC = 0.143. (c) Local resolution map of the EC structure. (d) Cryo-EM density of EC with the fitted atomic model.



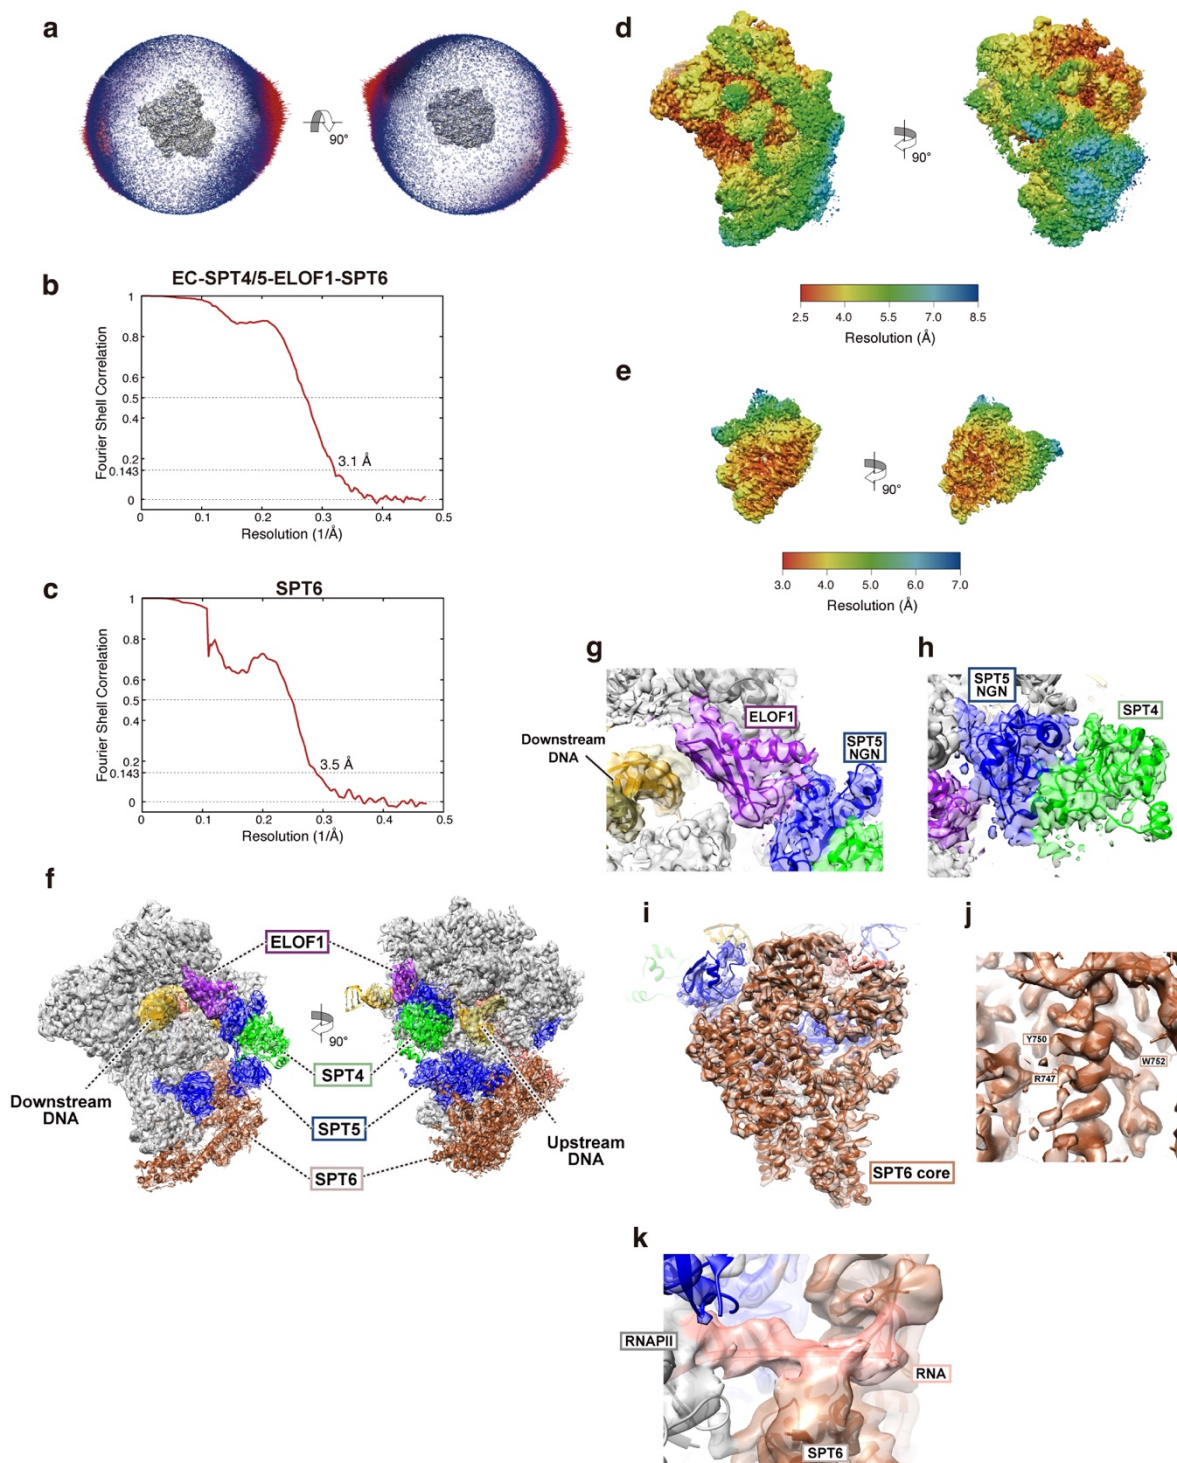

**Supplementary Fig. 5. Quality of the EC-SPT4/5-ELOF1-SPT6 structure.** (a) Euler angular distribution of the structure. (b, c) Fourier Shell Correlation (FSC) curves for EC (b) and SPT6 (c). The resolutions were estimated to be 3.1 and 3.5 Å, respectively, by an FSC = 0.143. (d, e) Local resolution maps of the EC (d) and SPT6 (e) structures. (f) Cryo-EM density of EC-SPT4/5-ELOF1-SPT6 with the fitted atomic model. (g, h) Close-up views of the ELOF1 (g) and SPT5 NGN-SPT4 (h) densities with the fitted atomic models. (i) Cryo-EM density of SPT6 with the fitted atomic model. The focused refined map of SPT6 is shown. (j) Close-up of the cryo-EM density of SPT6. (k) RNA density around SPT6. The low pass filtered map at 5 Å is shown with the atomic models.

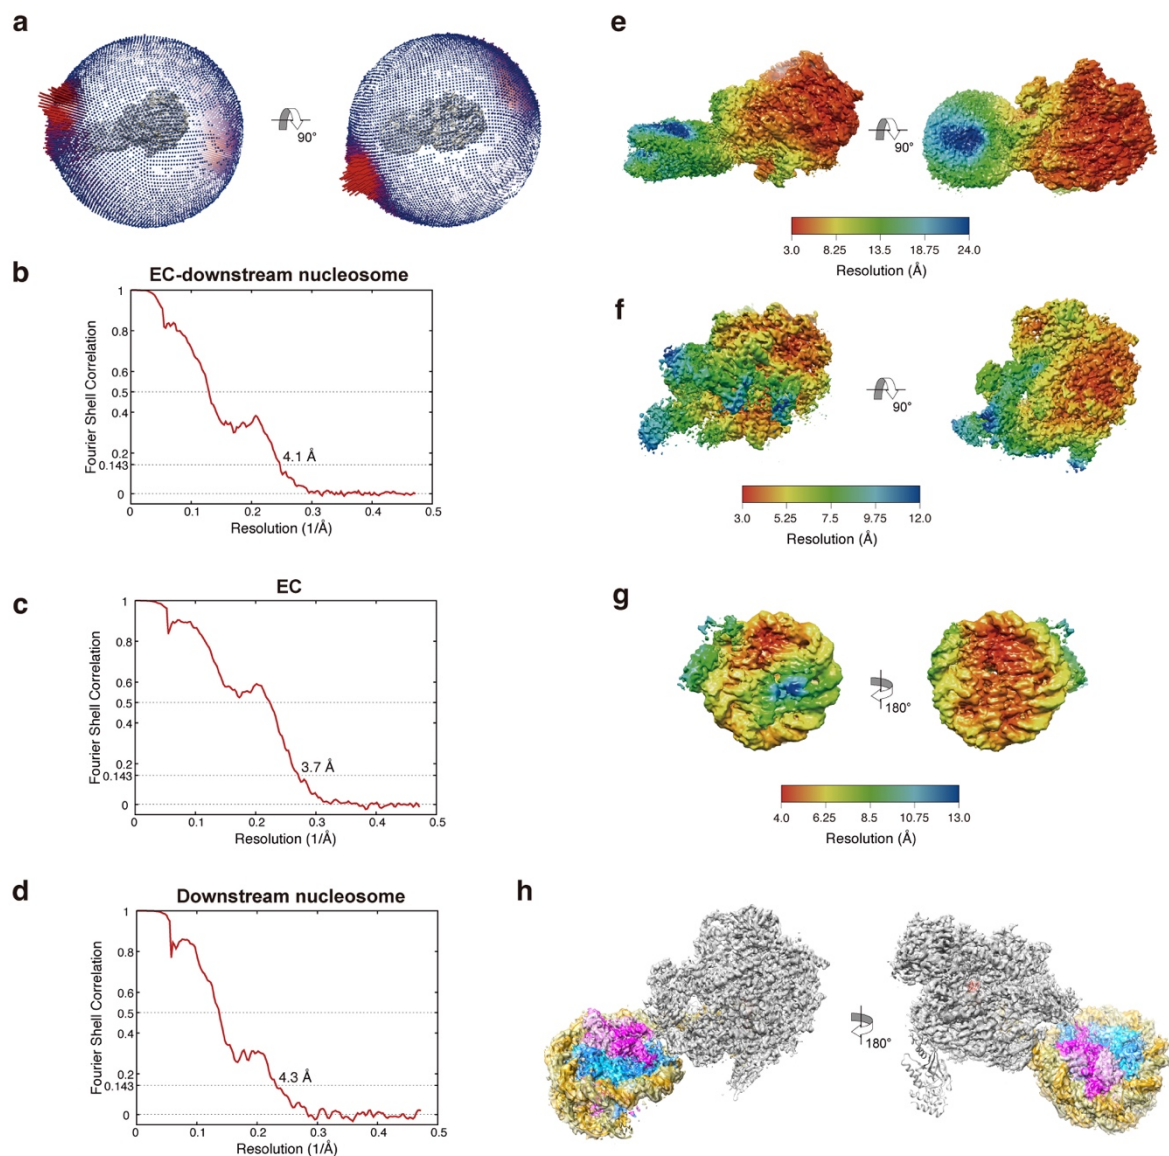

**Supplementary Fig. 6. Quality of the EC-downstream nucleosome structure.** (a) Euler angular distribution of the structure. (b-d) Fourier Shell Correlation (FSC) curves for the EC-downstream nucleosome (b), EC (c), and downstream nucleosome (d). The resolutions of the EC-downstream nucleosome, EC, and downstream nucleosome structures were estimated to be 4.1, 3.7, and 4.3 Å, respectively, by an FSC = 0.143. (e-g) Local resolution maps of the EC-downstream nucleosome (e), EC (f), and downstream nucleosome (g). (h) Cryo-EM density of the EC-downstream nucleosome composite map with the fitted atomic model.



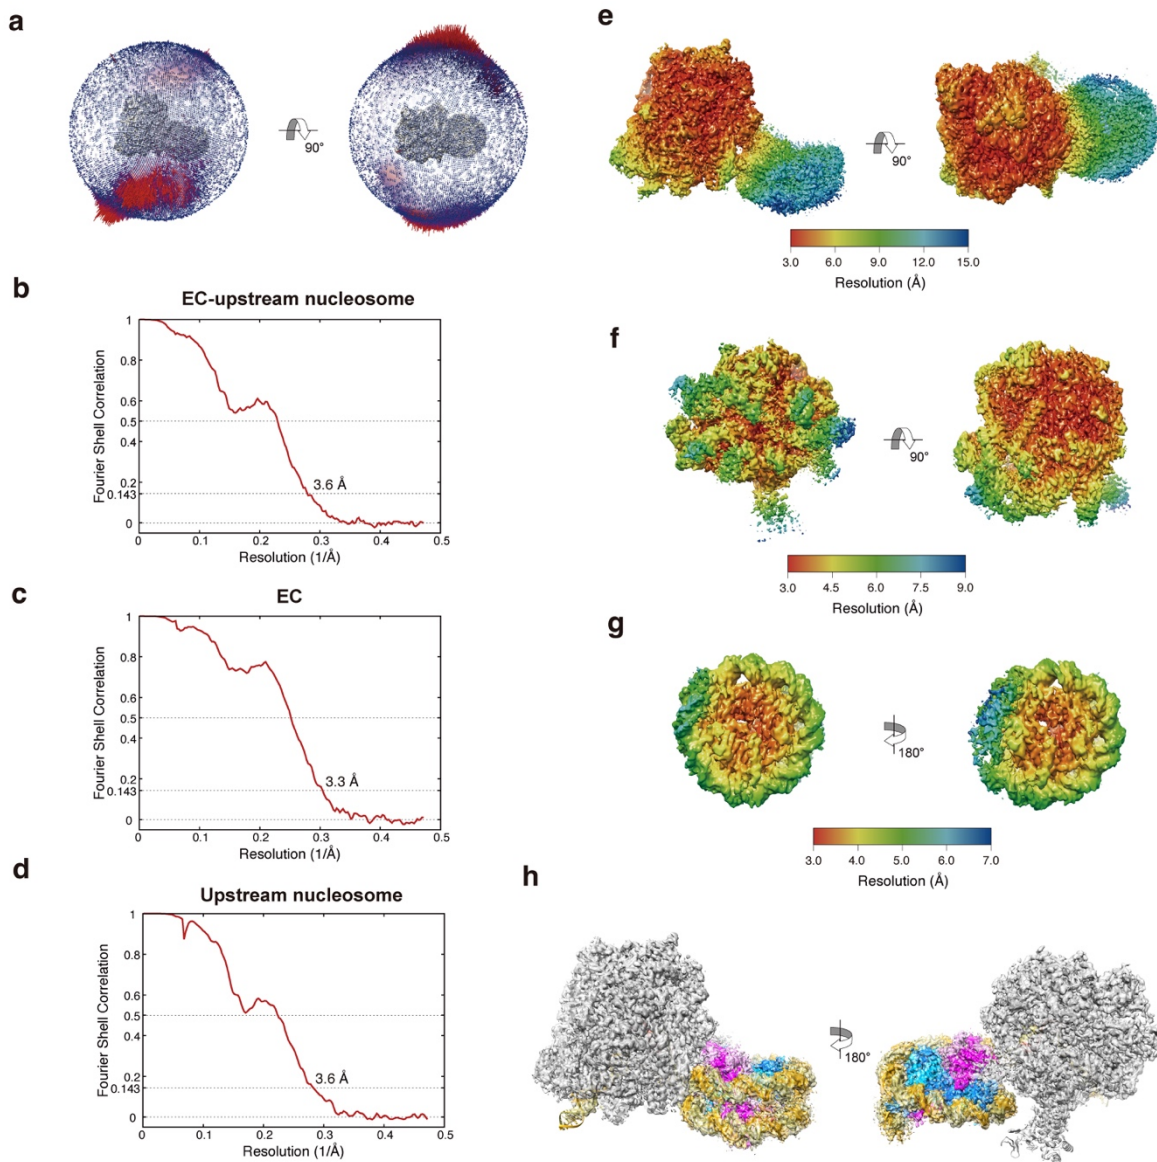

**Supplementary Fig. 7. Quality of the EC-upstream nucleosome structure.** (a) Euler angular distribution of the structure. (b-d) Fourier Shell Correlation (FSC) curves for the EC-upstream nucleosome (b), EC (c), and upstream nucleosome (d). The resolutions of the EC-upstream nucleosome, EC, and upstream nucleosome structures were estimated to be 3.6, 3.3, and 3.6 Å, respectively, by an FSC = 0.143. (e-g) Local resolution maps of the EC-upstream nucleosome (e), EC (f), and upstream nucleosome (g). (h) Cryo-EM density of the EC-upstream nucleosome composite map with the fitted atomic model.

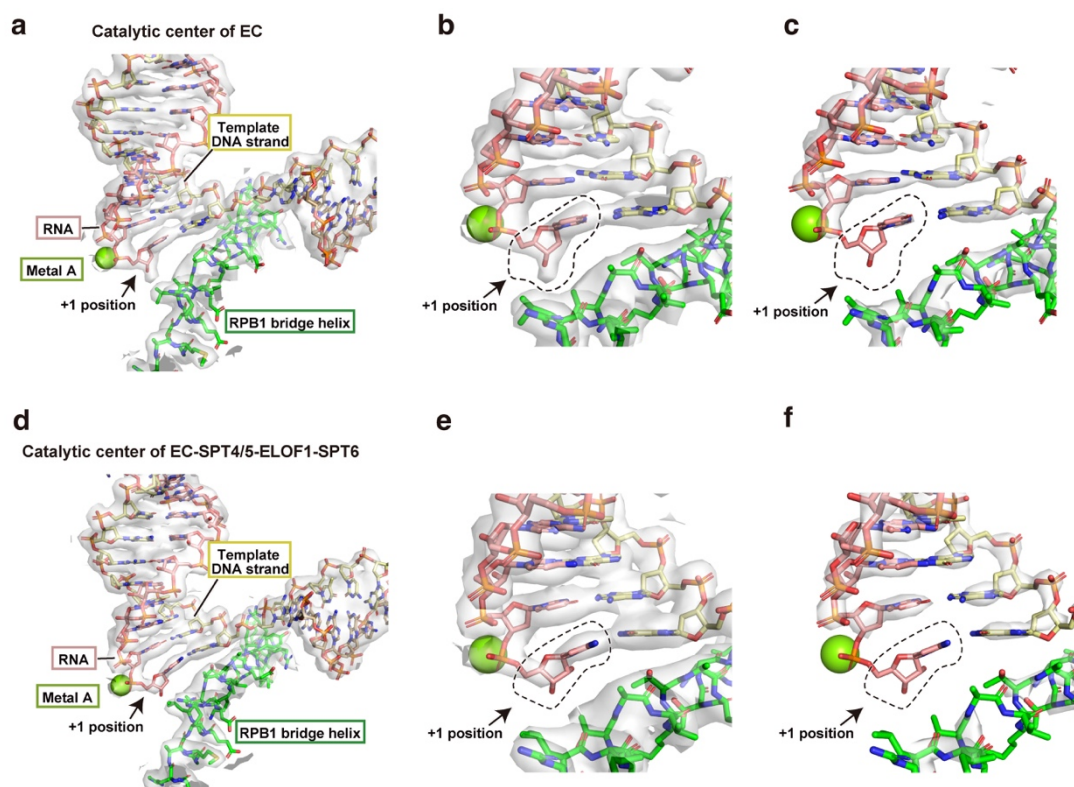

**Supplementary Fig. 8. Catalytic centers of EC and EC-SPT4/5-ELOF1-SPT6.** (a) The catalytic center of EC. (b,c) The +1 RNA base density at low (b) and high (c) contour levels of EC. (d) The catalytic center of EC-SPT4/5-ELOF1-SPT6. (e,f) The +1 RNA base density at low (e) and high (f) contour levels of EC-SPT4/5-ELOF1-SPT6. The DNA and RNA densities with the fitted atomic models are shown. The green sphere indicates the magnesium ion called metal A, which indicates the location of the catalytic center. The +1 position of the base in the catalytic center is indicated.

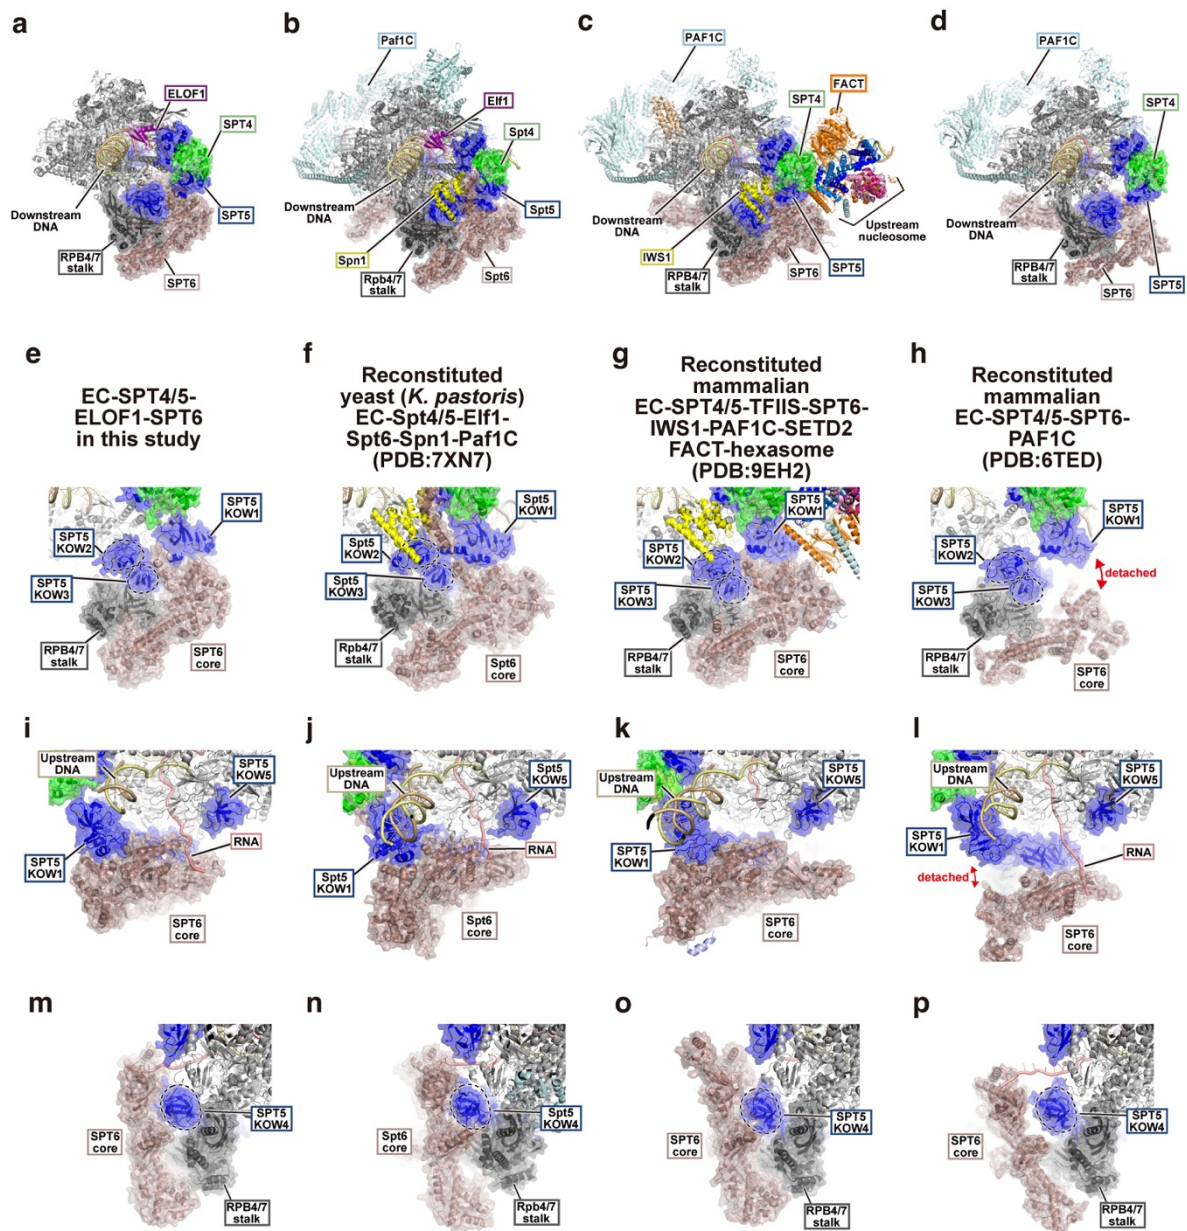

**Supplementary Fig. 9. Structural comparison of ECs complexed with transcription elongation factors. (a,e,i, and m)** Structure of the EC-SPT4/5-ELOF1-SPT6 complex in this study. **(b, f, j, and n)** Structure of the reconstituted yeast (*K. pastoris*) EC-Spt4/5-Elf1-Spt6-Spn1-Paf1C complex (PDB: 7XN7). **(c, g, k, and o)** Structure of the reconstituted mammalian EC-SPT4/5-TFIIS-SPT6-IWS1-PAF1C-SETD2-FACT-hexasome complex (PDB:9EH2). **(d, h, l, and p)** Structure of the reconstituted mammalian EC-SPT4/5- SPT6-PAF1C complex (PDB:6TED). **(e-h)** Close-up views of RPB4/7 stalk-SPT5 (KOW1 and 3)-SPT6 interaction. **(i-l)** Close-up views of SPT5 KOW1-SPT6 interaction. PAF1C and FACT-histone complexes are omitted for clarity. **(m-p)** Close-up views of SPT5 KOW4-SPT6 interaction.



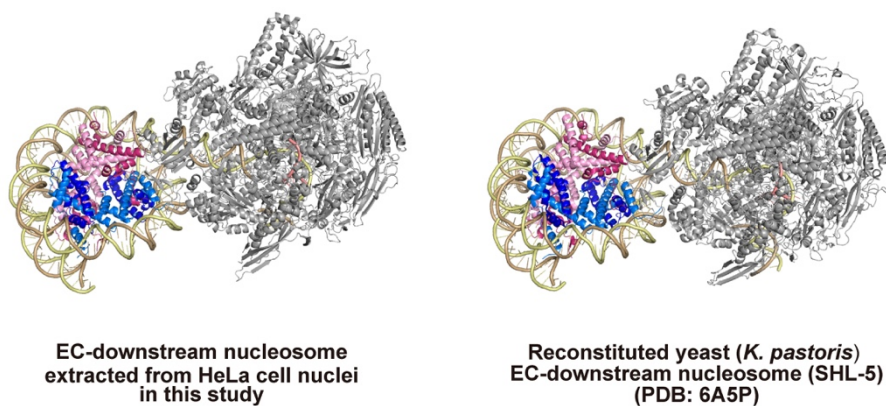

**Supplementary Fig. 10. Comparison between the EC-downstream nucleosome and reconstituted yeast EC-nucleosome complexes.** The structures of the EC-downstream nucleosome in this study and the reconstituted yeast (*K. pastoris*) EC-nucleosome, in which EC is paused at the SHL(-5) position in the nucleosome, are shown.

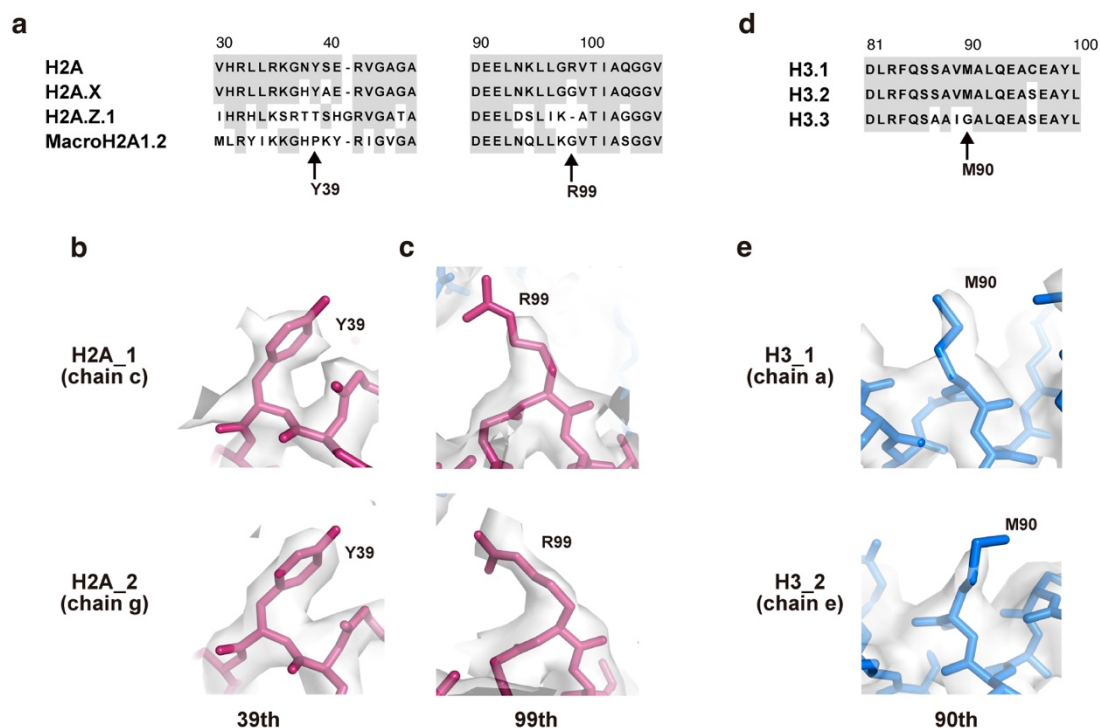

**Supplementary Fig. 11. CryoEM density of the histone side chains in the EC-upstream nucleosome.** (a) Amino acid sequence alignment of the histone H2A variants. (b, c) The side chain densities of the 39<sup>th</sup> (b) and 99<sup>th</sup> (c) residues of H2A. The two H2A molecules contained in the nucleosome are shown. (d) Amino acid sequence alignment of the histone H3 variants. (e) The side chain densities of the 90<sup>th</sup> residues of H3. The two H3 molecules contained in the nucleosome are shown.



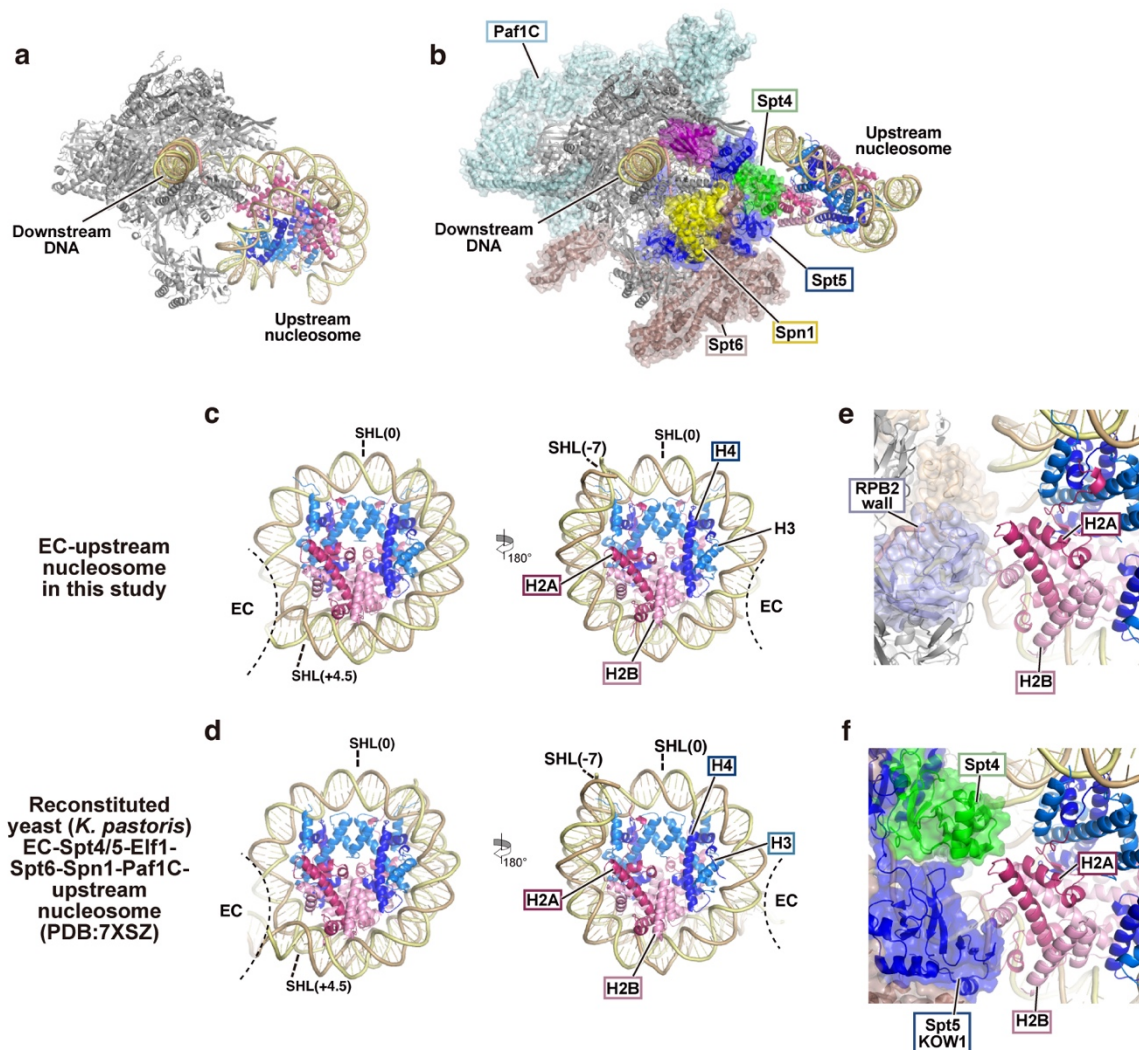

**Supplementary Fig. 12. Comparison between the EC-upstream nucleosome and reconstituted yeast EC-Spt4/5-Elf1-Spt6-Spn1-Paf1C-upstream nucleosome (EC115) complexes. (a, b)** The structures of the EC-upstream nucleosome in this study (a) and the EC-Spt4/5-Elf1-Spt6-Spn1-Paf1C-upstream nucleosome (EC115) complex (PDB: 7XSZ) (b). **(c,d)** Close-up views of the upstream nucleosome structures of the EC-upstream nucleosome (c) and EC115 (d). **(e)** Close-up view of the H2A-H2B dimer-RPB2 wall interaction. **(f)** Close-up view of the H2A-H2B dimer-Spt4-Spt5 KOW1 interaction.

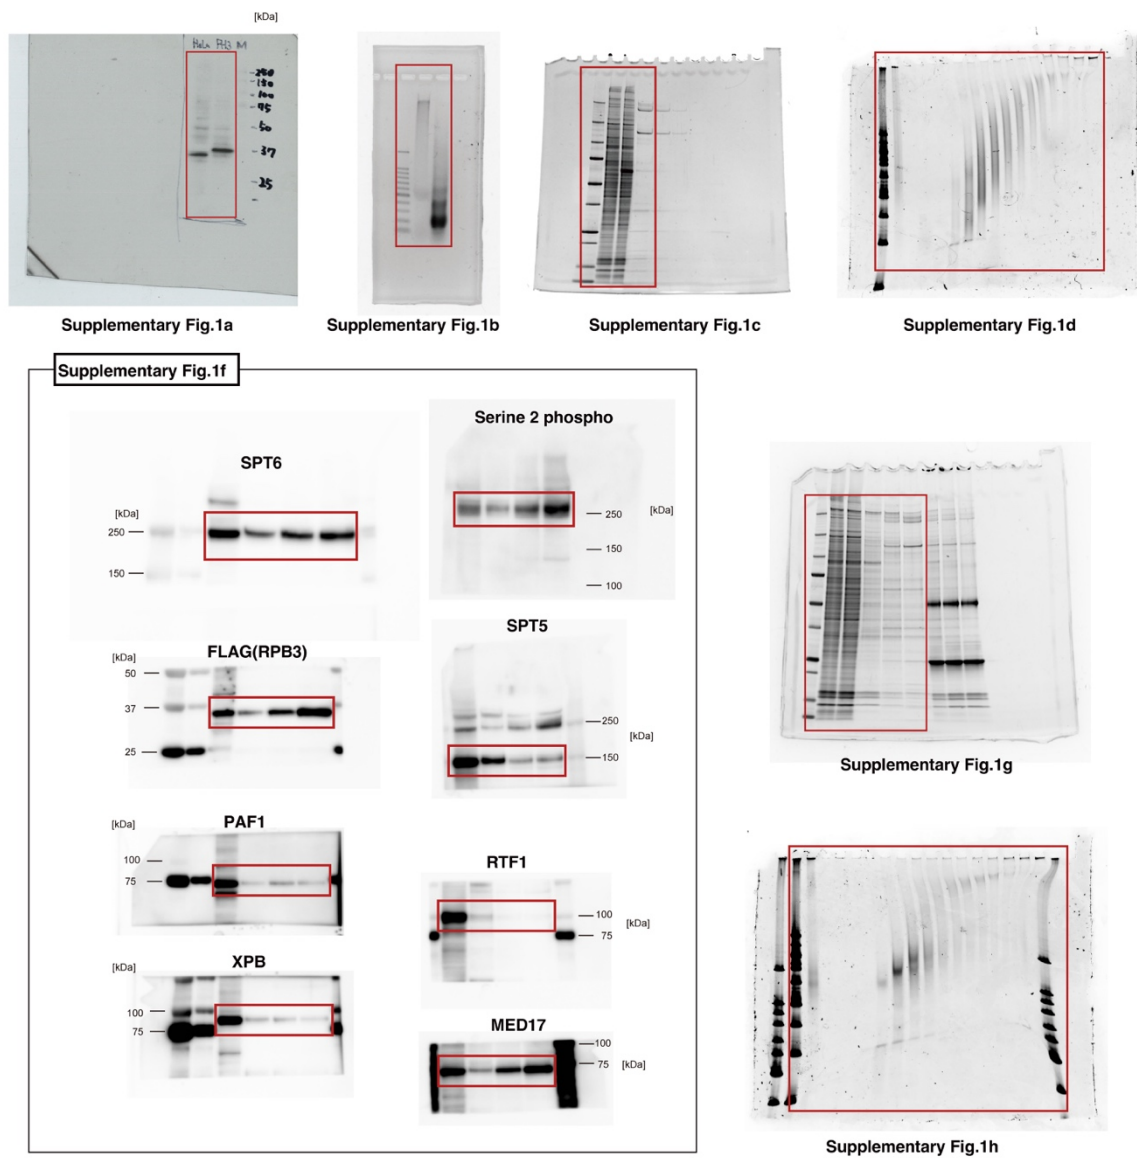

**Source Data of Supplementary Fig. 1.** The uncropped scans of all blots and gels. The areas shown in the Supplementary Fig. 1 are indicated by red rectangles.
